# Supplementary material
Source: PubMed Central journal article supplement (PMC9997777)
Supplement: medi-102-e33178-s001.pdf [file medi-102-e33178-s001.pdf]

**Supplemental Table 1:** Univariable analysis of criteria associated with admission to Medical Ward versus Discharge Home. Using an initial cut-off of  $p=0.10$ , variables used at the start of building the multivariable analysis are highlighted in blue. CI: Confidence Interval; CRP: C-reactive protein; BUN: Blood urea nitrogen; ALC: Absolute lymphocyte count; CK: Creatinine kinase; SOFA: Sequential Organ Failure Assessment; CCI: Charlson Comorbidity Index; HIV: Human immunodeficiency virus; ADI: Area Deprivation Index

| Variable                                                                               | OR (95% CI)    | p value |
|----------------------------------------------------------------------------------------|----------------|---------|
| Age, years (per year)                                                                  | 1.0 (1.0-1.0)  | <0.001  |
| Female Sex (reference: male sex)                                                       | 0.8 (0.6-1.0)  | 0.09    |
| CRP, mg/L (per unit)                                                                   | 1.0 (1.0-1.0)  | <0.001  |
| BUN, mg/dL (per unit)                                                                  | 1.0 (1.0-1.1)  | <0.001  |
| ALC, K/uL (per unit)                                                                   | 0.8 (0.7-1.0)  | 0.09    |
| CK, U/L (per unit)                                                                     | 1.0 (1.0-1.0)  | 0.09    |
| D-dimer, ng/mL (per unit)                                                              | 1.0 (1.0-1.0)  | 0.27    |
| Procalcitonin, ng/mL (per unit)                                                        | 1.7 (1.0-1.2)  | 0.20    |
| Troponin, ng/L (per unit)                                                              | 1.0 (1.0-1.0)  | <0.001  |
| Ferritin, ug/L (per unit)                                                              | 1.0 (1.0-1.0)  | 0.004   |
| SOFA (per unit in the score)                                                           | 1.0 (0.9-1.0)  | 0.41    |
| CCI (per unit in the score)                                                            | 1.2 (1.1-1.3)  | <0.001  |
| Hypotension (SBP <90mmHg) on admission (reference: no hypotension on admission)        | 4.3 (1.3-14.3) | 0.02    |
| Oxygen requirement on admission (reference: no oxygen requirement on admission)        | 5.4 (3.6-8.1)  | <0.001  |
| History of renal disease (reference: no history)                                       | 2.4 (1.4-3.6)  | <0.001  |
| History of lung disease (reference: no history)                                        | 1.0 (0.7-1.3)  | 0.94    |
| History of hypertension (reference: no history)                                        | 1.4 (1.1-1.8)  | 0.02    |
| History of diabetes (reference: no history)                                            | 1.4 (1.0-1.8)  | 0.04    |
| History of congestive heart failure (reference: no history)                            | 3.1 (1.8-5.4)  | <0.001  |
| History of stroke (reference: no history)                                              | 2.7 (1.3-5.5)  | 0.01    |
| History of HIV (reference: no history)                                                 | 1.6 (0.5-5.7)  | 0.45    |
| BMI $\geq 30\text{mg}/\text{kg}^2$ (reference: BMI <30mg/kg <sup>2</sup> )             | 1.0 (0.7-1.3)  | 0.72    |
| Non-white race (reference: White race)                                                 | 0.6 (0.5-0.8)  | 0.001   |
| Area Deprivation Index (ADI)                                                           | 0.9 (0.9-1.0)  | 0.04    |
| Non-English primary language (reference: English)                                      | 0.7 (0.5-0.9)  | 0.01    |
| Homelessness (reference: domiciled)                                                    | 2.5 (1.0-6.5)  | 0.06    |
| Illicit drug use (opiates, cocaine, methamphetamines) (reference: no illicit drug use) | 4.0 (1.6-10.1) | 0.004   |
| Current cigarette smoker (reference: no active cigarette use)                          | 2.3 (1.2-4.5)  | 0.01    |

**Supplemental Table 2:** Univariable analysis of criteria associated with admission to ICU versus Medical Ward Using an initial cut-off of  $p=0.10$ , variables used at the start of building the multivariable analysis are highlighted in blue. CI: Confidence Interval; CRP: C-reactive protein; BUN: Blood urea nitrogen; ALC: Absolute lymphocyte count; CK: Creatinine kinase; SOFA: Sequential Organ Failure Assessment; CCI: Charlson Comorbidity Index; HIV: Human immunodeficiency virus; ADI: Area Deprivation Index

|                                                                                        | <b>OR (95% CI)</b> | <b>p value</b> |
|----------------------------------------------------------------------------------------|--------------------|----------------|
| Age, years (per year)                                                                  | 1.0 (1.0-1.0)      | 0.15           |
| Female Sex (reference: male sex)                                                       | 0.6 (0.4-0.8)      | 0.002          |
| CRP, mg/L (per unit)                                                                   | 1.0 (1.0-1.0)      | <0.001         |
| BUN, mg/dL (per unit)                                                                  | 1.0 (1.0-1.0)      | <0.001         |
| ALC, K/uL (per unit)                                                                   | 0.9 (0.6-1.2)      | 0.31           |
| CK, U/L (per unit)                                                                     | 1.0 (1.0-1.0)      | 0.01           |
| D-dimer, ng/mL (per unit)                                                              | 1.0 (1.0-1.0)      | <0.001         |
| Procalcitonin, ng/mL (per unit)                                                        | 1.0 (1.0-1.1)      | 0.03           |
| Troponin, ng/L (per unit)                                                              | 1.0 (1.0-1.0)      | 0.002          |
| Ferritin, ug/L (per unit)                                                              | 1.0 (1.0-1.0)      | <0.001         |
| SOFA (per unit in the score)                                                           | 1.1 (1.0-1.2)      | 0.003          |
| CCI (per unit in the score)                                                            | 1.0 (1.0-1.1)      | 0.66           |
| Hypotension (SBP <90mmHg) on admission (reference: no hypotension on admission)        | 2.3 (1.3-4.2)      | 0.01           |
| Oxygen requirement on admission (reference: no oxygen requirement on admission)        | 6.2 (4.2-9.3)      | <0.001         |
| History of renal disease (reference: no history)                                       | 1.0 (0.7-1.5)      | 0.99           |
| History of lung disease (reference: no history)                                        | 0.8 (0.6-1.2)      | 0.32           |
| History of hypertension (reference: no history)                                        | 1.0 (0.7-1.4)      | 0.88           |
| History of diabetes (reference: no history)                                            | 1.4 (1.0-1.9)      | 0.04           |
| History of congestive heart failure (reference: no history)                            | 0.7 (0.4-1.1)      | 0.10           |
| History of stroke (reference: no history)                                              | 0.7 (0.4-1.4)      | 0.29           |
| History of HIV (reference: no history)                                                 | 1.0 (0.3-3.6)      | 0.99           |
| BMI $\geq 30\text{mg}/\text{kg}^2$ (reference: BMI $< 30\text{mg}/\text{kg}^2$ )       | 1.8 (1.2-2.5)      | 0.002          |
| Non-white race (reference: White race)                                                 | 1.4 (1.0-1.9)      | 0.10           |
| Area Deprivation Index (ADI)                                                           | 1.1 (1.0-1.2)      | 0.04           |
| Non-English primary language (reference: English)                                      | 1.7 (1.2-2.6)      | 0.01           |
| Homelessness (reference: domiciled)                                                    | 0.3 (0.1-1.1)      | 0.06           |
| Illicit drug use (opiates, cocaine, methamphetamines) (reference: no illicit drug use) | 0.5 (0.2-1.2)      | 0.11           |
| Current cigarette smoker (reference: no active cigarette use)                          | 0.8 (0.4-1.5)      | 0.45           |
