# Supplementary material
Source: PubMed Central journal article supplement (PMC9997777)
Supplement: medi-102-e33178-s003.pdf [file medi-102-e33178-s003.pdf]

**Supplemental table 3b:** Multivariable findings regression findings for date of admission for admission to the Medical Ward rather than discharged home from the Emergency Department.\*

CI: Confidence Interval.

|                                               | Univariable Findings |         | Multivariable Findings |         |
|-----------------------------------------------|----------------------|---------|------------------------|---------|
|                                               | Odds Ratio (95% CI)  | p-value | Odds Ratio (95% CI)    | p-value |
| <b>Timing of admission, days (per day)</b>    | 1.0 (1.0, 1.0)       | 0.04    | 0.9 (0.8, 1.0)         | 0.01    |
| <b>Timing of admission squared (per unit)</b> | 1.0 (1.0, 1.0)       | 0.05    | 1.001 (1.000, 1.002)   | 0.01    |

\*The regression model controlled for age, sex, C-reactive protein (CRP), creatinine kinase (CK), D-dimer, troponin, ferritin, oxygen requirement on hospital admission, body mass index (BMI)  $\geq 30\text{mg/kg}^2$ , race, area disparity index (ADI), homelessness, illicit drug use.
